# Supplementary material for: Porphyrin-linked nitroimidazole antibiotics targeting Porphyromonas gingivalis
Source: Royal Society of Chemistry journal article supplement (doi:10.1039/b904340c), 2009-01-01
Supplement: b904340c.pdf [file b904340c.pdf]

## Supporting Information

### Porphyrin-linked nitroimidazole antibiotics targeting *Porphyromonas gingivalis*

Benjamin C.-M. Yap, Grace L. Simpkins, Charles A. Collyer, Neil Hunter and Maxwell J. Crossley

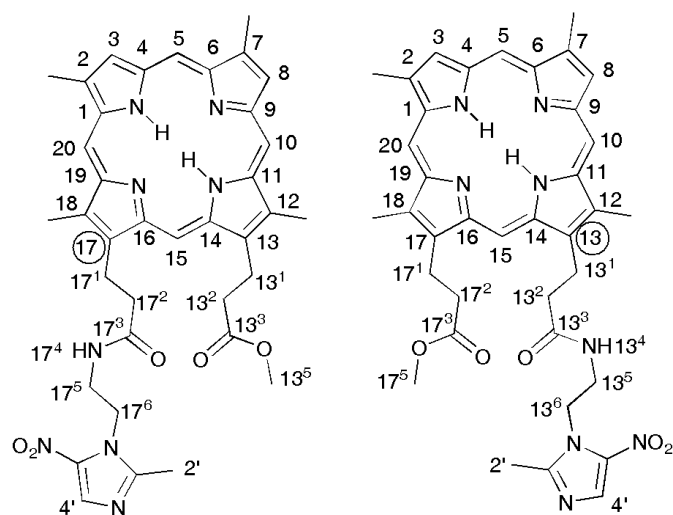

S1. Structures of **9** and **10** with numbering.

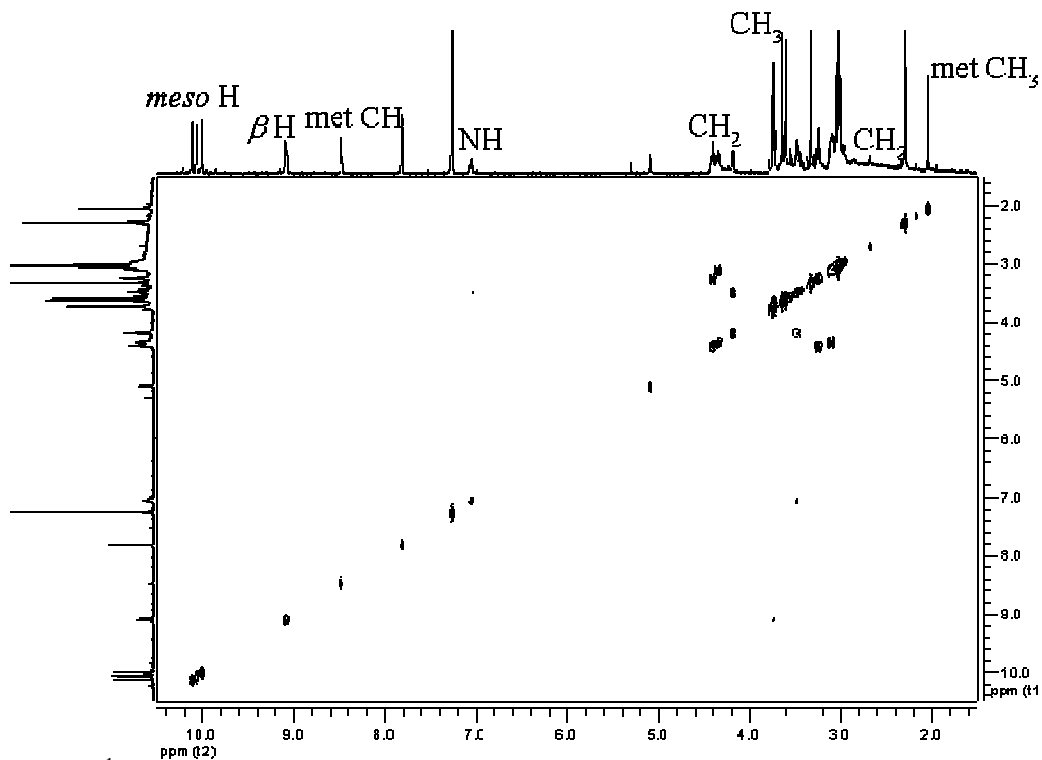

S2. 2D <sup>1</sup>H NMR COSY of **10**.

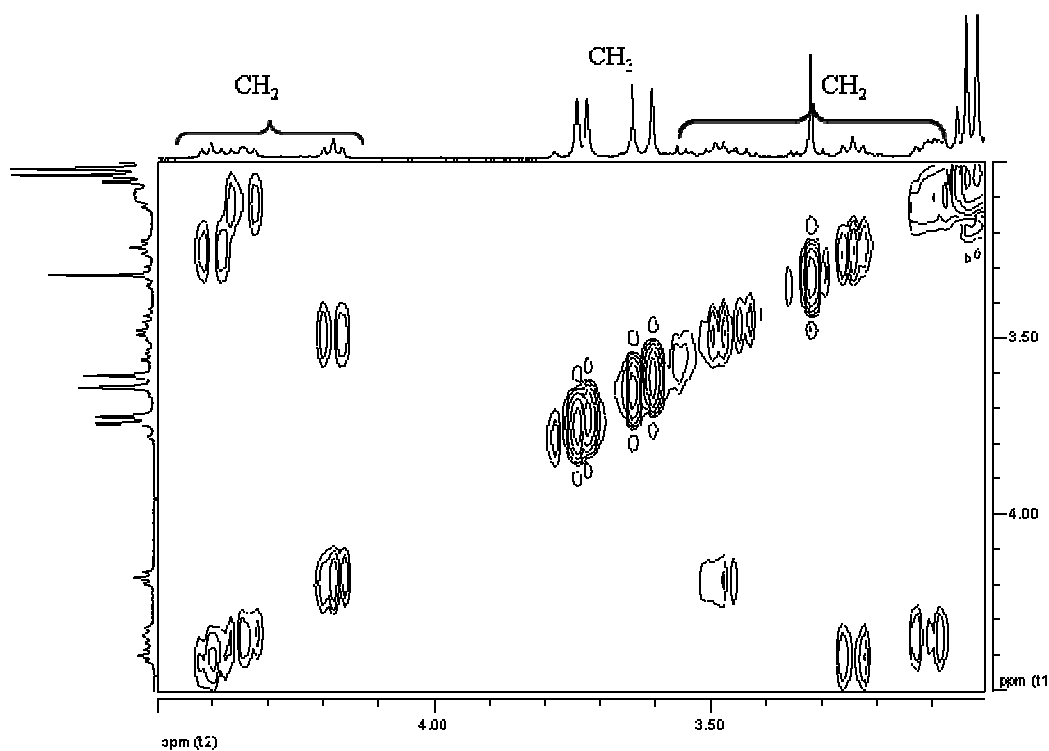

S3. Expansion of 2D <sup>1</sup>H NMR COSY of **10**.

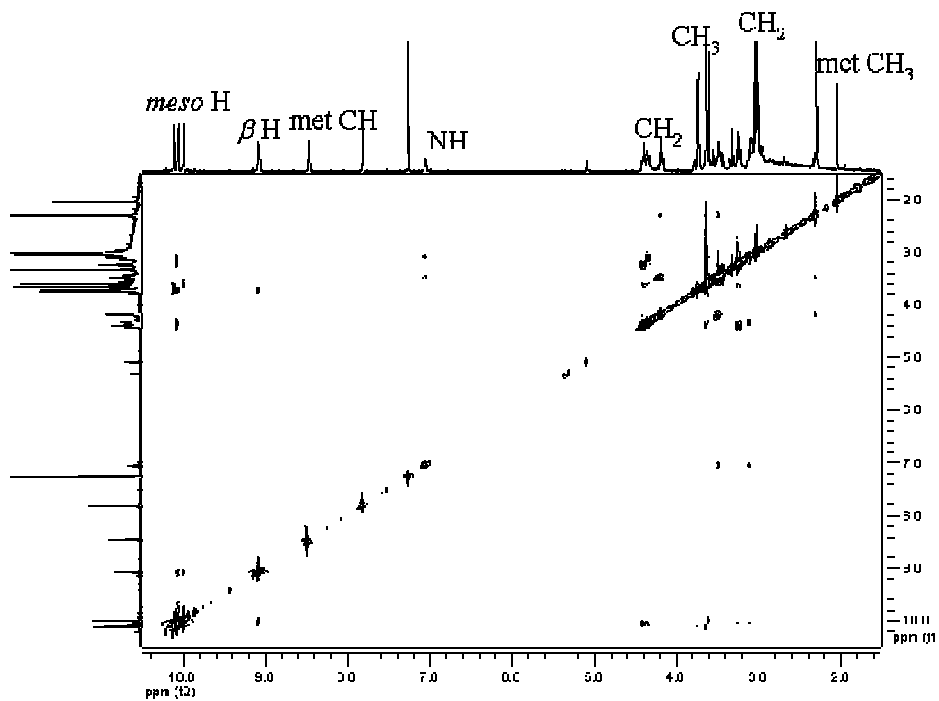

S4. 2D <sup>1</sup>H NMR NOESY of **10**.

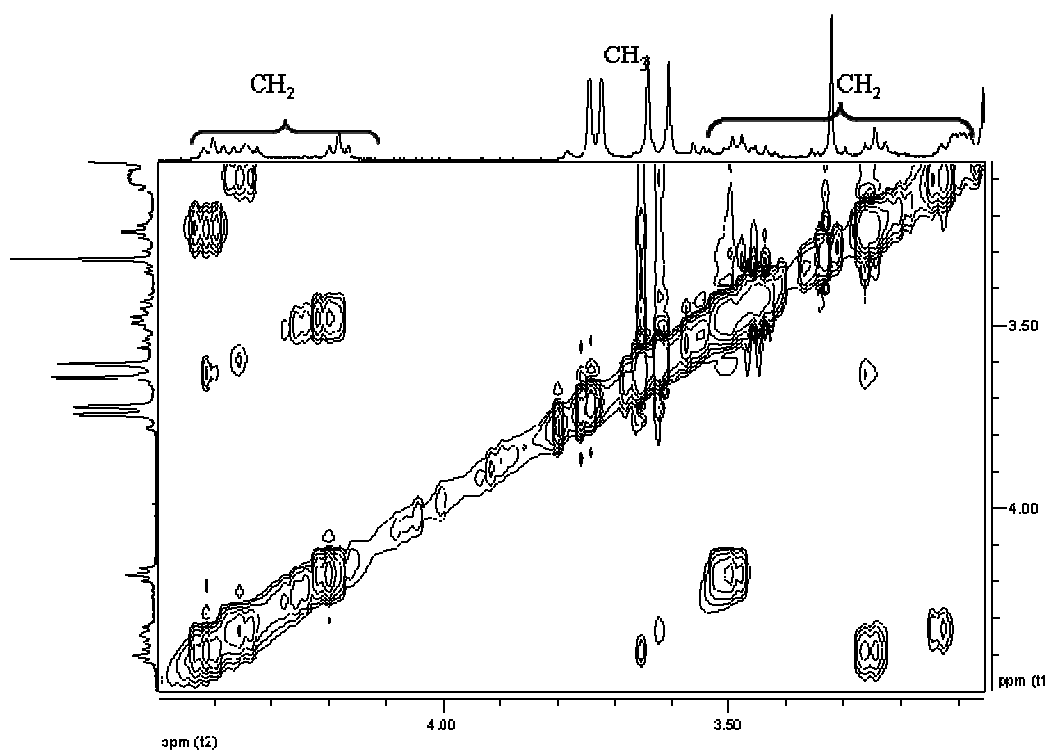

S5. Expansion of 2D <sup>1</sup>H NMR NOESY of 10.

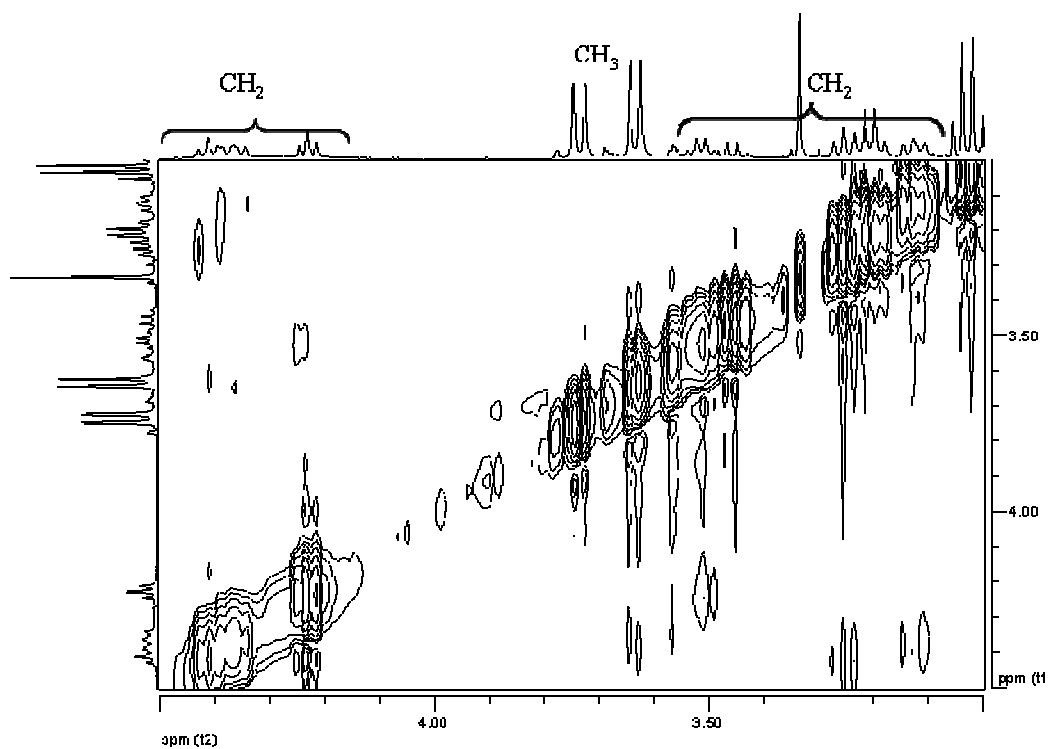

S6. Expansion of 2D <sup>1</sup>H NMR NOESY of 9.
